# Supplementary material for: Alcoholic liver disease: A registry view on comorbidities and disease prediction
Source: PubMed Central journal article supplement (PMC7531835; doi:10.1371/journal.pcbi.1008244), 2020-09-22
Supplement: pcbi.1008244.s001.pdf [file pcbi.1008244.s001.pdf]

# S1 File: Supporting information for the paper ”Alcoholic liver disease: A registry view on comorbidities and disease prediction”

Dhouha Grissa, Ditlev Nytoft Rasmussen, Aleksander Krag, Søren Brunak,  
Lars Juhl Jensen

September 10, 2020

## 1 Equations

The Odds Ratio (OR) is given by,

$$OR = \frac{\text{Odds that a case was exposed}}{\text{Odds that a control was exposed}} = \frac{a/c}{b/d} \quad (1)$$

The Coverage (COV) is given by,

$$COV = \text{Number of patients with the key diagnosis} = a \quad (2)$$

The Matthews Correlation Coefficient (MCC) is given by,

$$MCC = \frac{(a \times d - b \times c)}{\sqrt{(a + b) \times (a + c) \times (d + b) \times (d + c)}} \quad (3)$$

## 2 Supplementary Figures and Tables

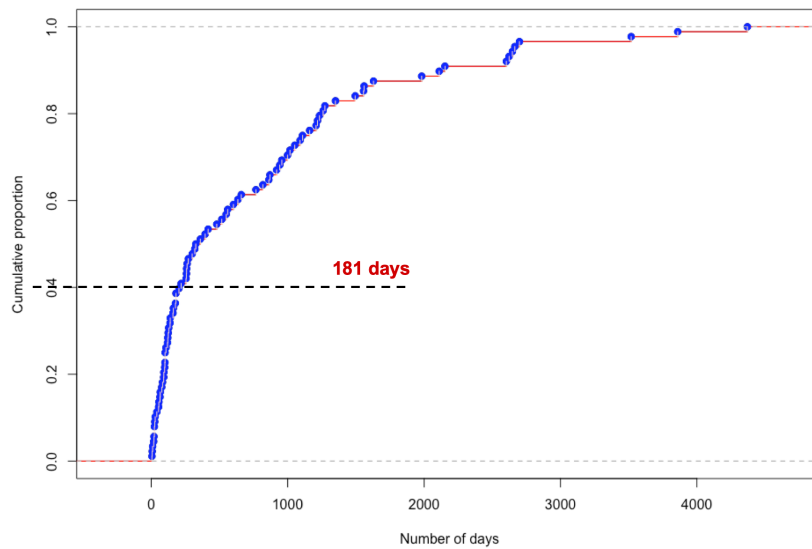

Figure A. *The cumulative distribution of the 88 patients with ALF and ALC.*

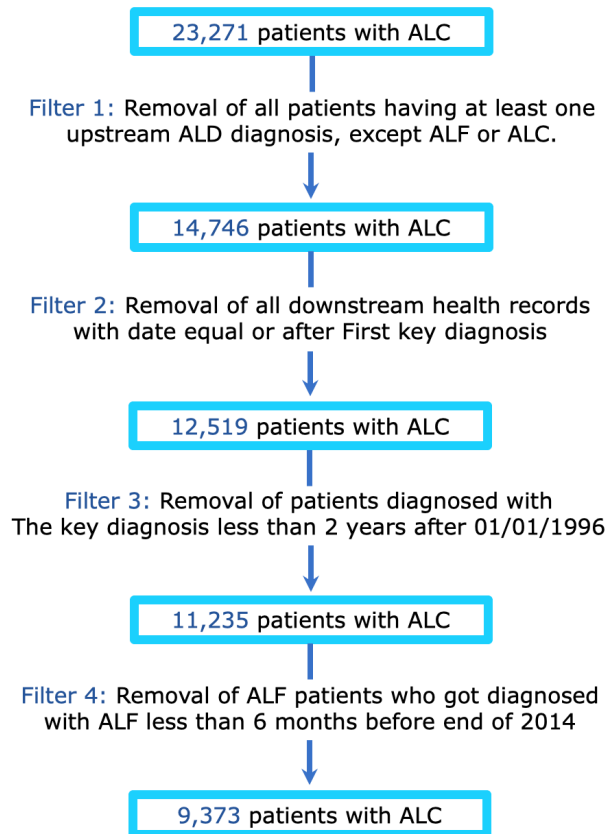

Figure B. *The Flowchart of number of patients with ALC when applying the different filtering criteria.*

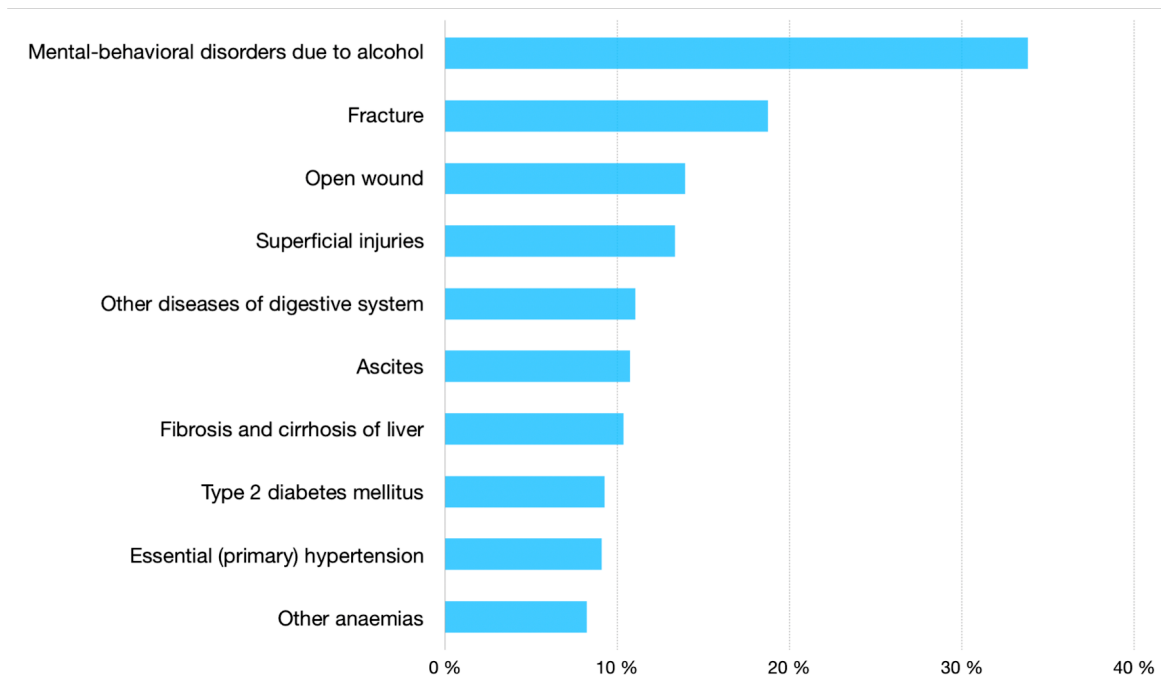

Figure C. *The histogram of most frequent upstream ICD-10 codes among patients with ALC.*

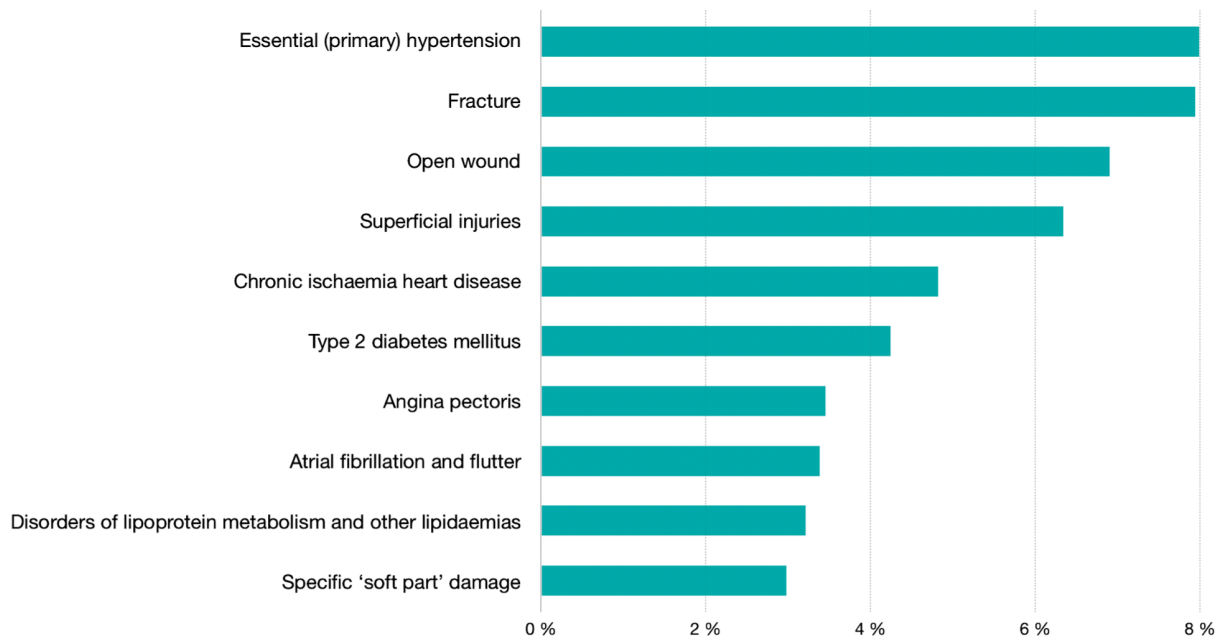

Figure D. *The histogram of most frequent upstream ICD-10 codes among patients with non-ALD.*

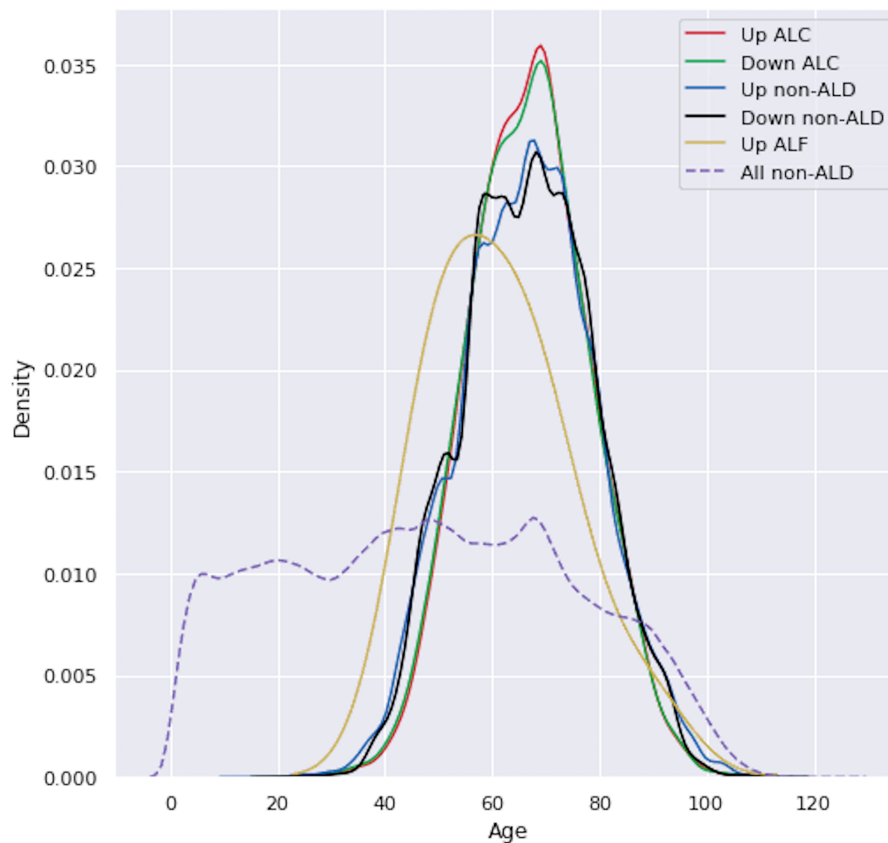

Figure E. *The distribution of the age ratio among all the discovered groups of patients (ALC, All non-ALD, non-ALD and ALF) both upstream and downstream.*

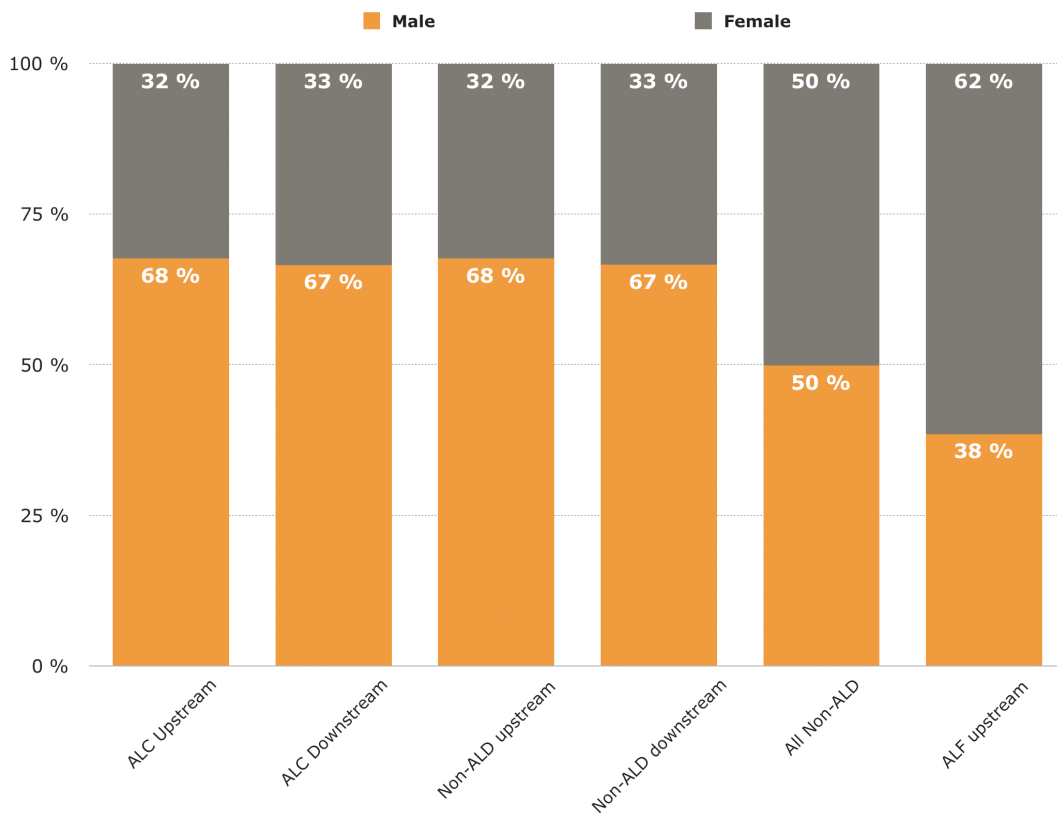

Figure F. The distribution of the sex ratio among all the discovered groups of patients (ALC, All non-ALD, non-ALD and ALF) both upstream and downstream.

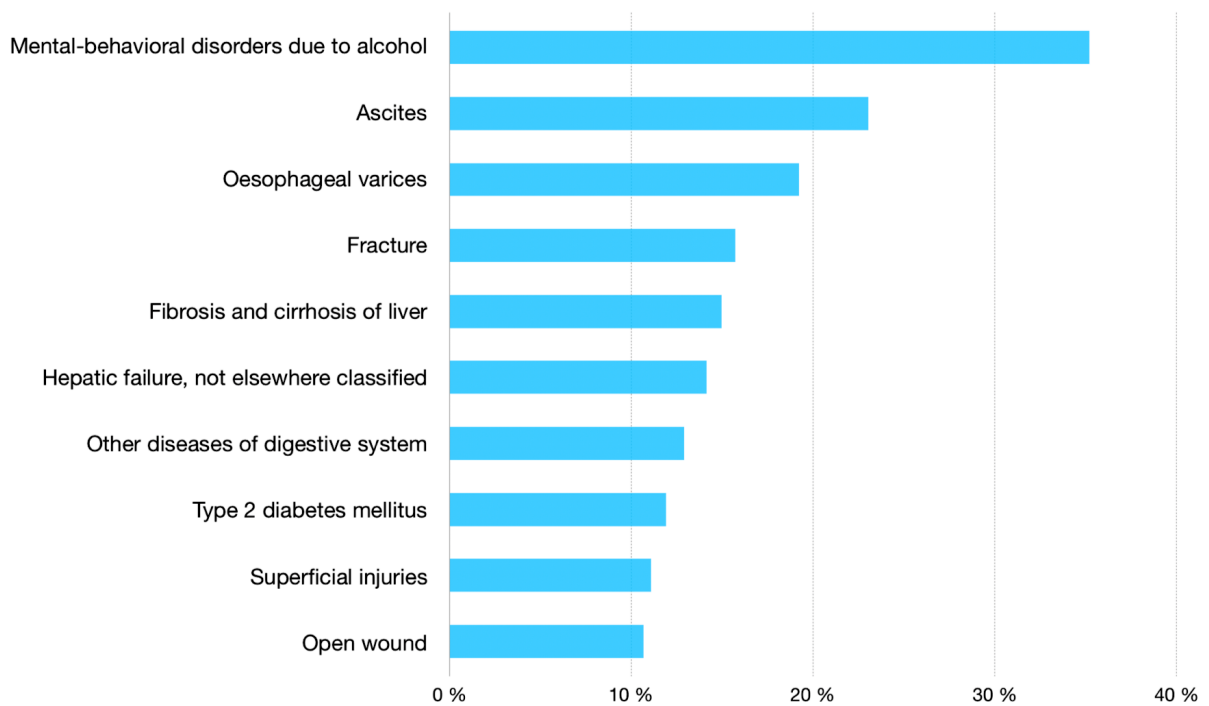

Figure G. The histogram of most frequent downstream ICD-10 codes among patients with ALC.

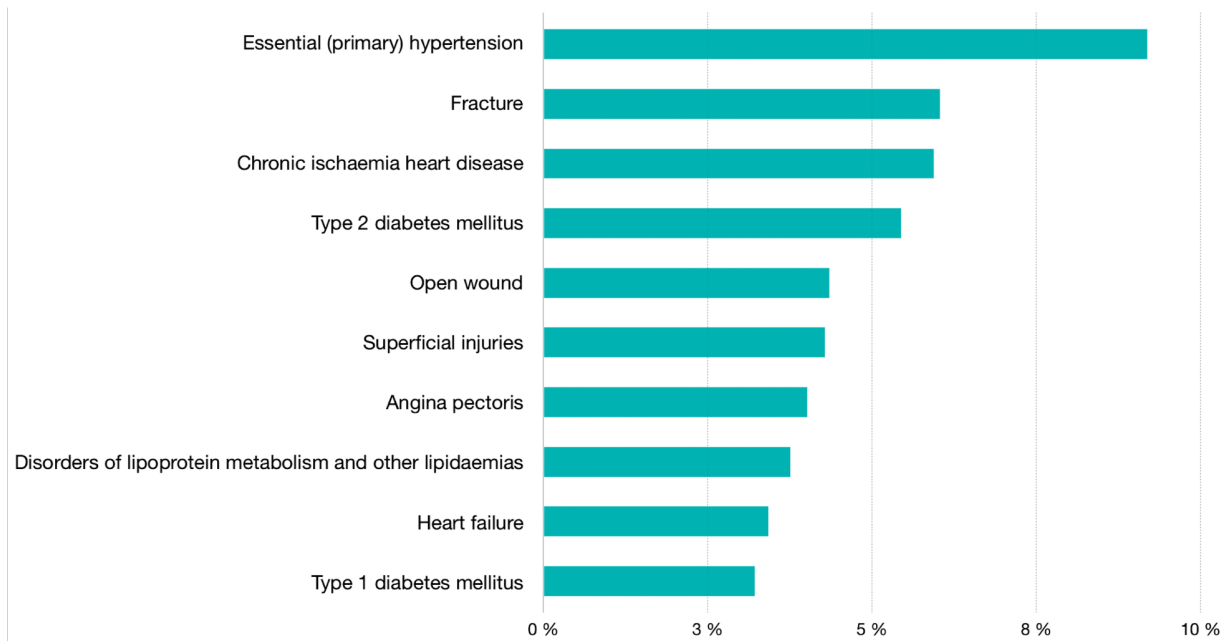

Figure H. The histogram of most frequent downstream ICD-10 codes among patients with non-ALD.

| Variable description       | Variable name        | Variable type | Explanation                                                                                                 |
|----------------------------|----------------------|---------------|-------------------------------------------------------------------------------------------------------------|
| Personal identifier        | <b>UNIQ_ID</b>       | string        | A unique ID that is given to each patient                                                                   |
| Admission identifier       | <b>ADMISSION_ID</b>  | numeric       | An ID that is unique to each entry the patients has to the hospital                                         |
| Records number             | <b>RECORD_NUMBER</b> | numeric       | Also unique for each entry the patients has to the hospital                                                 |
| Type of hospital encounter | <b>PATIENT_TYPE</b>  | qualitative   | Describes whether the patient is an in-hospital (0/1), out-hospital (2) or emergency-department (3) patient |
| Admission date             | <b>ADM_DATE</b>      | date          | The date of admission                                                                                       |
| Discharge date             | <b>DIS_DATE</b>      | date          | The date of discharge                                                                                       |
| Hospital owner             | <b>OWNER</b>         | categoric     | Whether the hospital is public or private                                                                   |
| Hospital identifier        | <b>HOSPITAL_ID</b>   | numeric       | ID of the hospital the patient is treated at                                                                |
| Ward identifier            | <b>WARD_ID</b>       | numeric       | The ward of the hospital the patient is treated at                                                          |
| ICD10 code                 | <b>CODE</b>          | string        | The ICD-10 diagnosis code (in the Danish system, theres a 'D' placed in front of the ICD-10 code)           |
| Code type                  | <b>CODE_TYPE</b>     | string        | Whether it is an A 'primary', B 'secondary', H 'referral' or any other code                                 |
| Source table               | <b>SOURCE_TABLE</b>  | categoric     | describes whether the entry is about a diagnose, a screening etc                                            |
| Number of contact days     | <b>CONTACT_DAYS</b>  | numeric       | The number of days the patient have been at the hospital for this specific entry                            |

Table A. The main 13 variables in the Danish National Patient Register. The key variables are the Civil Personal Register (CPR) number (a unique personal identifier used in all Danish registries), the discharge date (*Dis.date*), and the diagnosis code (a unique code designing each diagnosis or disease). This code is developed by the International Classification of Diseases (ICD), version 10th. Only variables with names in bold were used in this manuscript.

| Chapters removed from the study     |                                                                                         |         |
|-------------------------------------|-----------------------------------------------------------------------------------------|---------|
| ICD10 code                          | Chapter description                                                                     | Chapter |
| DH00 - DH59                         | Diseases of the eye and adnexa                                                          | VII     |
| DJ00 - DJ99                         | Diseases of the respiratory system                                                      | X       |
| DL00 - DL99                         | Diseases of the skin and subcutaneous tissue                                            | XII     |
| DO00 - DO99                         | Pregnancy, childbirth and the puerperium                                                | XV      |
| DP00 - DP96                         | Certain conditions originating in the perinatal period                                  | XVI     |
| DQ00 - DQ99                         | Congenital malformations, deformations and chromosomal abnormalities                    | XVII    |
| DR00 - DR99                         | Symptoms, signs and abnormal clinical and laboratory findings, not elsewhere classified | XVIII   |
| DV01 - DY98                         | External causes of morbidity and mortality                                              | XX      |
| DZ00 - DZ99                         | Factors influencing health status and contact with health services                      | XXI     |
| ICD-10 codes removed from the study |                                                                                         |         |
| ICD10 code                          | Level 3 codes                                                                           | Chapter |
| DS07                                | Crushing injury of head                                                                 | XIX     |
| DS17                                | Crushing injury of neck                                                                 | XIX     |
| DS27                                | Injury of other and unspecified intrathoracic organs                                    | XIX     |
| DS37                                | Injury of urinary and pelvic organs                                                     | XIX     |
| DS47                                | Crushing injury of shoulder and upper arm                                               | XIX     |
| DS57                                | Crushing injury of forearm                                                              | XIX     |
| DS67                                | Crushing injury of wrist and hand                                                       | XIX     |
| DS77                                | Crushing injury of hip and thigh                                                        | XIX     |
| DS87                                | Crushing injury of lower leg                                                            | XIX     |
| DS97                                | Crushing injury of ankle and foot                                                       | XIX     |
| DS08                                | Traumatic amputation of part of head                                                    | XIX     |
| DS18                                | Traumatic amputation at neck level                                                      | XIX     |
| DS28                                | Crushing injury of thorax and traumatic amputation of part of thorax                    | XIX     |
| DS38                                | Crushing injury and traumatic amputation of part of abdomen, lower back and pelvis      | XIX     |
| DS48                                | Traumatic amputation of shoulder and upper arm                                          | XIX     |
| DS58                                | Traumatic amputation of forearm                                                         | XIX     |
| DS68                                | Traumatic amputation of wrist and hand                                                  | XIX     |
| DS78                                | Traumatic amputation of hip and thigh                                                   | XIX     |
| DS88                                | Traumatic amputation of lower leg                                                       | XIX     |
| DS98                                | Traumatic amputation of ankle and foot                                                  | XIX     |
| DS09                                | Other and unspecified injuries of head                                                  | XIX     |
| DS19                                | Other and unspecified injuries of neck                                                  | XIX     |
| DS29                                | Other and unspecified injuries of thorax                                                | XIX     |
| DS39                                | Other and unspecified injuries of abdomen, lower back and pelvis                        | XIX     |
| DS49                                | Other and unspecified injuries of shoulder and upper arm                                | XIX     |
| DS59                                | Other and unspecified injuries of forearm                                               | XIX     |
| DS69                                | Other and unspecified injuries of wrist and hand                                        | XIX     |
| DS79                                | Other and unspecified injuries of hip and thigh                                         | XIX     |
| DS89                                | Other and unspecified injuries of lower leg                                             | XIX     |
| DS99                                | Other and unspecified injuries of ankle and foot                                        | XIX     |

Table B. *The list of chapters and codes that were judged as irrelevant by medical doctors and thus removed from the registry data before analysis.*

| Level 4 ICD-10 codes |                                           |                                                                                 |         |
|----------------------|-------------------------------------------|---------------------------------------------------------------------------------|---------|
| ICD10 code           | Code description                          | Block                                                                           | Chapter |
| DK700                | Alcoholic fatty liver                     | Diseases of liver (K70-K77)                                                     | XI      |
| DK701                | Alcoholic hepatitis                       | Diseases of liver (K70-K77)                                                     | XI      |
| DK702                | Alcoholic fibrosis and sclerosis of liver | Diseases of liver (K70-K77)                                                     | XI      |
| DK703                | Alcoholic cirrhosis of liver              | Diseases of liver (K70-K77)                                                     | XI      |
| DK704                | Alcoholic hepatic failure                 | Diseases of liver (K70-K77)                                                     | XI      |
| DK709                | Alcoholic liver disease, unspecified      | Diseases of liver (K70-K77)                                                     | XI      |
| Merged ICD10 codes   |                                           |                                                                                 |         |
| ICD10 code           | New group                                 | Level 3 codes                                                                   | Chapter |
| DS00                 | Superficial injuries                      | Superficial injury of head                                                      | XIX     |
| DS10                 | Superficial injuries                      | Superficial injury of neck                                                      | XIX     |
| DS20                 | Superficial injuries                      | Superficial injury of thorax                                                    | XIX     |
| DS30                 | Superficial injuries                      | Superficial injury of abdomen, lower back and pelvis                            | XIX     |
| DS40                 | Superficial injuries                      | Superficial injury of shoulder and upper arm                                    | XIX     |
| DS50                 | Superficial injuries                      | Superficial injury of forearm                                                   | XIX     |
| DS60                 | Superficial injuries                      | Superficial injury of wrist and hand                                            | XIX     |
| DS70                 | Superficial injuries                      | Superficial injury of hip and thigh                                             | XIX     |
| DS80                 | Superficial injuries                      | Superficial injury of lower leg                                                 | XIX     |
| DS90                 | Superficial injuries                      | Superficial injury of ankle and foot                                            | XIX     |
| DS01                 | Open wound                                | Open wound of head                                                              | XIX     |
| DS11                 | Open wound                                | Open wound of neck                                                              | XIX     |
| DS21                 | Open wound                                | Open wound of thorax                                                            | XIX     |
| DS31                 | Open wound                                | Open wound of abdomen, lower back and pelvis                                    | XIX     |
| DS41                 | Open wound                                | Open wound of shoulder and upper arm                                            | XIX     |
| DS51                 | Open wound                                | Open wound of forearm                                                           | XIX     |
| DS61                 | Open wound                                | Open wound of wrist and hand                                                    | XIX     |
| DS71                 | Open wound                                | Open wound of hip and thigh                                                     | XIX     |
| DS81                 | Open wound                                | Open wound of lower leg                                                         | XIX     |
| DS91                 | Open wound                                | Open wound of ankle and foot                                                    | XIX     |
| DS02                 | Fracture                                  | Fracture of skull and facial bones                                              | XIX     |
| DS12                 | Fracture                                  | Fracture of neck                                                                | XIX     |
| DS22                 | Fracture                                  | Fracture of rib(s), sternum and thoracic spine                                  | XIX     |
| DS32                 | Fracture                                  | Fracture of lumbar spine and pelvis                                             | XIX     |
| DS42                 | Fracture                                  | Fracture of shoulder and upper arm                                              | XIX     |
| DS52                 | Fracture                                  | Fracture of forearm                                                             | XIX     |
| DS62                 | Fracture                                  | Fracture at wrist and hand level                                                | XIX     |
| DS72                 | Fracture                                  | Fracture of femur                                                               | XIX     |
| DS82                 | Fracture                                  | Fracture of lower leg, including ankle                                          | XIX     |
| DS92                 | Fracture                                  | Fracture of foot, except ankle                                                  | XIX     |
| DS04                 | Specific 'soft part' damage               | Injury of cranial nerves                                                        | XIX     |
| DS14                 | Specific 'soft part' damage               | Injury of nerves and spinal cord at neck level                                  | XIX     |
| DS24                 | Specific 'soft part' damage               | Injury of nerves and spinal cord at thorax level                                | XIX     |
| DS34                 | Specific 'soft part' damage               | Injury of nerves and lumbar spinal cord at abdomen, lower back and pelvis level | XIX     |
| DS44                 | Specific 'soft part' damage               | Injury of nerves at shoulder and upper arm level                                | XIX     |
| DS54                 | Specific 'soft part' damage               | Injury of nerves at forearm level                                               | XIX     |
| DS64                 | Specific 'soft part' damage               | Injury of nerves at wrist and hand level                                        | XIX     |
| DS74                 | Specific 'soft part' damage               | Injury of nerves at hip and thigh level                                         | XIX     |
| DS84                 | Specific 'soft part' damage               | Injury of nerves at lower leg level                                             | XIX     |
| DS94                 | Specific 'soft part' damage               | Injury of nerves at ankle and foot level                                        | XIX     |
| DS05                 | Specific 'soft part' damage               | Injury of eye and orbit                                                         | XIX     |
| DS15                 | Specific 'soft part' damage               | Injury of blood vessels at neck level                                           | XIX     |
| DS25                 | Specific 'soft part' damage               | Injury of blood vessels of thorax                                               | XIX     |
| DS35                 | Specific 'soft part' damage               | Injury of blood vessels at abdomen, lower back and pelvis level                 | XIX     |
| DS45                 | Specific 'soft part' damage               | Injury of blood vessels at shoulder and upper arm level                         | XIX     |
| DS55                 | Specific 'soft part' damage               | Injury of blood vessels at forearm level                                        | XIX     |
| DS65                 | Specific 'soft part' damage               | Injury of blood vessels at wrist and hand level                                 | XIX     |
| DS75                 | Specific 'soft part' damage               | Injury of blood vessels at hip and thigh level                                  | XIX     |
| DS85                 | Specific 'soft part' damage               | Injury of blood vessels at lower leg level                                      | XIX     |
| DS95                 | Specific 'soft part' damage               | Injury of blood vessels at ankle and foot level                                 | XIX     |
| DS06                 | Specific 'soft part' damage               | Intracranial injury                                                             | XIX     |
| DS16                 | Specific 'soft part' damage               | Injury of muscle and tendon at neck level                                       | XIX     |
| DS26                 | Specific 'soft part' damage               | Injury of heart                                                                 | XIX     |
| DS36                 | Specific 'soft part' damage               | Injury of intra-abdominal organs                                                | XIX     |
| DS46                 | Specific 'soft part' damage               | Injury of muscle and tendon at shoulder and upper arm level                     | XIX     |
| DS56                 | Specific 'soft part' damage               | Injury of muscle and tendon at forearm level                                    | XIX     |
| DS66                 | Specific 'soft part' damage               | Injury of muscle and tendon at wrist and hand level                             | XIX     |
| DS76                 | Specific 'soft part' damage               | Injury of muscle and tendon at hip and thigh level                              | XIX     |
| DS86                 | Specific 'soft part' damage               | Injury of muscle and tendon at lower leg level                                  | XIX     |
| DS96                 | Specific 'soft part' damage               | Injury of muscle and tendon at ankle and foot level                             | XIX     |

Table C. The list of level-4 ICD-10 codes used for ALD and the set of codes that were merged into one unique code.

| Filtering criteria for cases                                                                                            | ALF | ALC |
|-------------------------------------------------------------------------------------------------------------------------|-----|-----|
| Removal of all patients having at least one of the ALD diseases, except ALF or ALC                                      | x   | x   |
| Removal of all downstream health records with assignment date equal or after first date of the key diagnosis            | x   | x   |
| Removal of all patients who got diagnosed with the key diagnosis less than 2 years after 01/01/1996 (first date of NPR) | x   | x   |
| Removal of all patients who got diagnosed with ALF less than 6 months before 31/12/2014 (end of NPR data at hand)       | x   | -   |

**Table D.** *The list of filtering criteria for the case cohort depending on the outcome of interest (ALF or ALC). In total, four filtering steps were applied in order to extract the most suitable case-control cohorts required for the ALD study analysis.*

|              |     | Diagnosed with Target Disease? |    |
|--------------|-----|--------------------------------|----|
|              |     | Yes                            | No |
| Diagnosis X? | Yes | a                              | b  |
|              | No  | c                              | d  |

**Table E.** *A  $2 \times 2$  contingency table. The a, b, c and d refer respectively to patients with the disease who got assigned the diagnosis (a), patients without the disease who got assigned the diagnosis (b), patients with the disease who do not got assigned the diagnosis (c) and patients without the disease who do not got assigned the diagnosis (d).*

| Years   | #patients | #Diagnoses |
|---------|-----------|------------|
| 6 years | 8,256     | 871        |
| 5 years | 8,777     | 860        |
| 4 years | 9,180     | 856        |
| 3 years | 9,433     | 853        |
| 2 years | 9,373     | 811        |
| 1 year  | 8,626     | 750        |

**Table F.** *An overview of the number of patients and diagnoses when changing the size of the time-window from 6 years to 1 year of the upstream data of ALC patients.*



| ICD10 code                                                             | MCC       | OR        | COV       |
|------------------------------------------------------------------------|-----------|-----------|-----------|
| Mental-behavioural disorders due to alcohol                            | <b>1</b>  | <b>15</b> | <b>1</b>  |
| Fibrosis and cirrhosis of liver                                        | <b>2</b>  | <b>2</b>  | <b>7</b>  |
| Ascites                                                                | <b>3</b>  | <b>5</b>  | <b>6</b>  |
| Other diseases of digestive system                                     | <b>4</b>  | <b>11</b> | <b>5</b>  |
| Oesophageal varices                                                    | <b>5</b>  | <b>1</b>  | <b>11</b> |
| Other anaemias                                                         | <b>6</b>  | 58        | <b>10</b> |
| Other diseases of liver                                                | <b>7</b>  | <b>6</b>  | <b>16</b> |
| Gastritis and duodenitis                                               | <b>8</b>  | <b>40</b> | <b>13</b> |
| Hepatic failure, not elsewhere classified                              | <b>9</b>  | <b>4</b>  | 21        |
| Gastric ulcer                                                          | <b>10</b> | 47        | <b>15</b> |
| Fracture                                                               | <b>11</b> | 171       | <b>2</b>  |
| Other diseases of pancreas                                             | <b>12</b> | 45        | <b>18</b> |
| Chronic viral hepatitis                                                | <b>13</b> | <b>16</b> | 26        |
| Other and unspecified polyneuropathies                                 | <b>14</b> | <b>17</b> | 28        |
| Duodenal ulcer                                                         | <b>15</b> | 51        | 22        |
| Oesophagitis                                                           | <b>16</b> | 41        | 29        |
| Abdominal and pelvic pain                                              | <b>17</b> | 145       | <b>12</b> |
| Symptoms and signs involving appearance and behaviour                  | <b>18</b> | <b>19</b> | 241       |
| Superficial injuries                                                   | <b>19</b> | 194       | <b>4</b>  |
| Open wound                                                             | <b>20</b> | 198       | <b>3</b>  |
| Type 2 diabetes mellitus                                               | 26        | 192       | <b>8</b>  |
| Other disorders of circulatory system in diseases classified elsewhere | 30        | <b>3</b>  | 95        |
| Hepatomegaly and splenomegaly not elsewhere classified                 | 35        | <b>7</b>  | 96        |
| Chronic hepatitis, not elsewhere classified                            | 38        | <b>9</b>  | 102       |
| Toxic liver disease                                                    | 43        | <b>14</b> | 104       |
| Specific 'soft part' damage                                            | 47        | 200       | <b>14</b> |
| Folate deficiency anaemia                                              | 53        | <b>8</b>  | 134       |
| Other nutritional anaemias                                             | 68        | <b>10</b> | 166       |
| Unspecified viral hepatitis                                            | 86        | <b>13</b> | 182       |
| Type 1 diabetes mellitus                                               | 87        | 215       | <b>19</b> |
| Acute and transient psychotic disorders                                | 100       | <b>20</b> | 192       |
| Nutritional marasmus                                                   | 112       | <b>12</b> | 212       |
| Heart failure                                                          | 130       | 222       | <b>17</b> |
| Other abnormalities of plasma proteins                                 | 135       | <b>18</b> | 223       |
| Essential (primary) hypertension                                       | 224       | 226       | <b>9</b>  |
| Chronic ischaemic heart disease                                        | 244       | 227       | <b>20</b> |

**Table G.** *The list of most relevant upstream diagnoses, obtained from computing the MCC, OR and COV metrics on the set of ALC patients and their matched controls. This list of 39 features is sorted according to the MCC ranking. In each column, we present in bold the features ranked top-20 for every metric.*

| Cohort                          | Patients          | Encounters | Codes |
|---------------------------------|-------------------|------------|-------|
|                                 | <b>Upstream</b>   |            |       |
| Cases (patients with ALC)       | 9,082             | 68,029     | 820   |
| Controls (patients with no-ALD) | 43,844            | 96,728     | 941   |
|                                 | <b>Downstream</b> |            |       |
| Cases (patients with ALC)       | 6,311             | 75,414     | 794   |
| Controls (patients with no-ALD) | 30,696            | 77,327     | 909   |

**Table H.** *The number of patients, clinical encounters and unique codes for cases and controls within 2-year upstream and downstream data.*
